# Supplementary material for: Exploring the causality and pathogenesis of systemic lupus erythematosus in breast cancer based on Mendelian randomization and transcriptome data analyses
Source: PubMed Central journal article supplement (PMC9885086; doi:10.3389/fimmu.2022.1029884), 2023-01-16

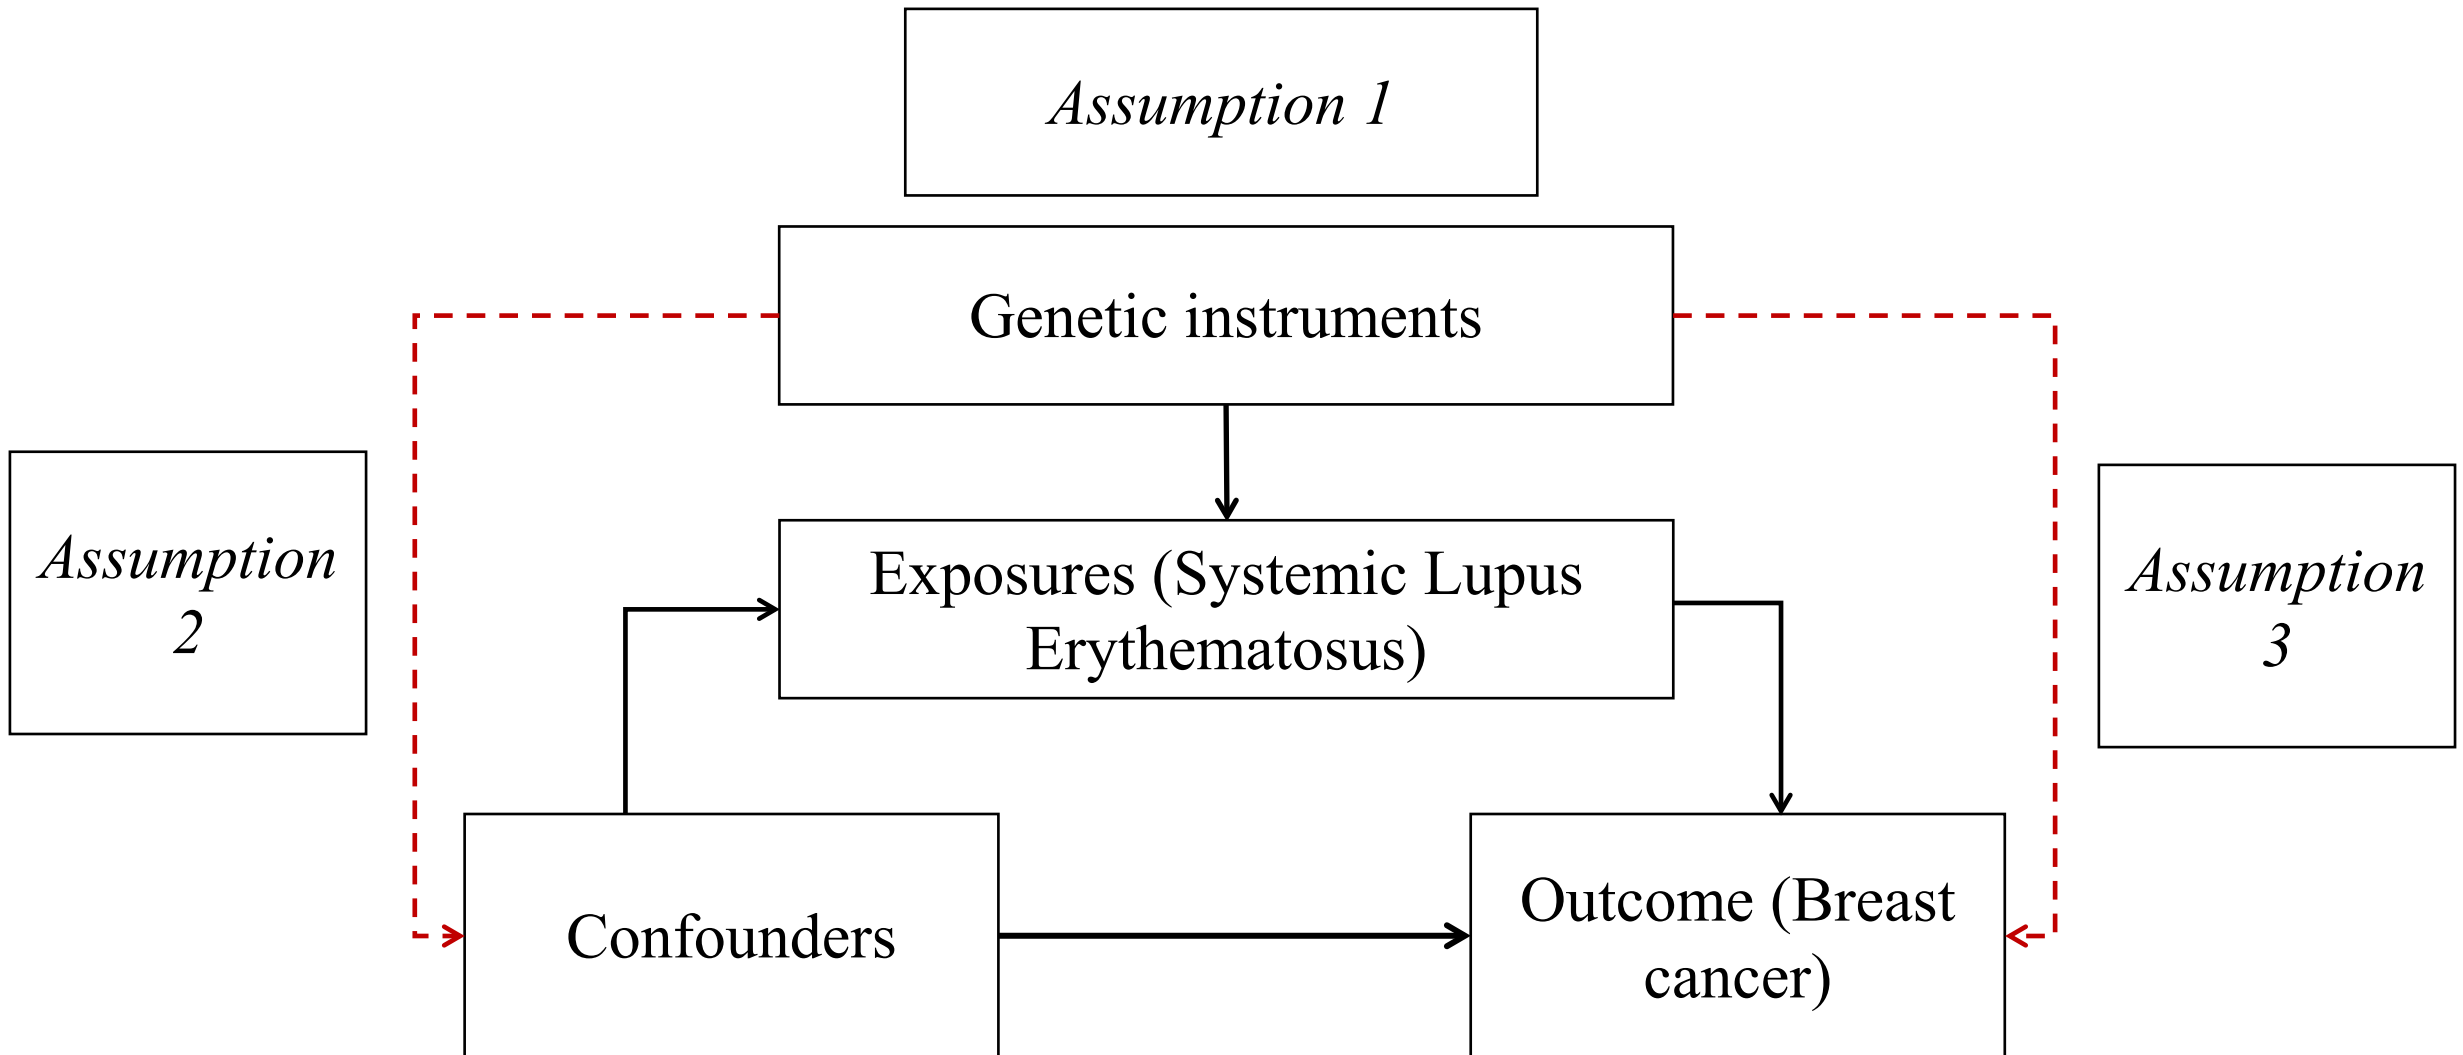

Supplement: DataSheet_3.pdf [file DataSheet_3.pdf]
